# Supplementary material for: Gut microbiome alpha-diversity is not a marker of Parkinson’s disease and multiple sclerosis
Source: PubMed Central journal article supplement (PMC8195527; doi:10.1093/braincomms/fcab113), 2021-06-01
Supplement: fcab113_supplementary_data.pdf [file fcab113_supplementary_data.pdf]

## Supplementary material

### Supplementary Figure 1: Number of sequence counts for each study

A) Number of sequence counts for each PD study. Each point corresponds to one sample. The horizontal line corresponds to the threshold of 10 000 sequences under which the sample was removed. B) Number of sequence counts for each MS study. Each point corresponds to one sample. The horizontal line corresponds to the threshold of 10 000 sequences under which the sample was removed.

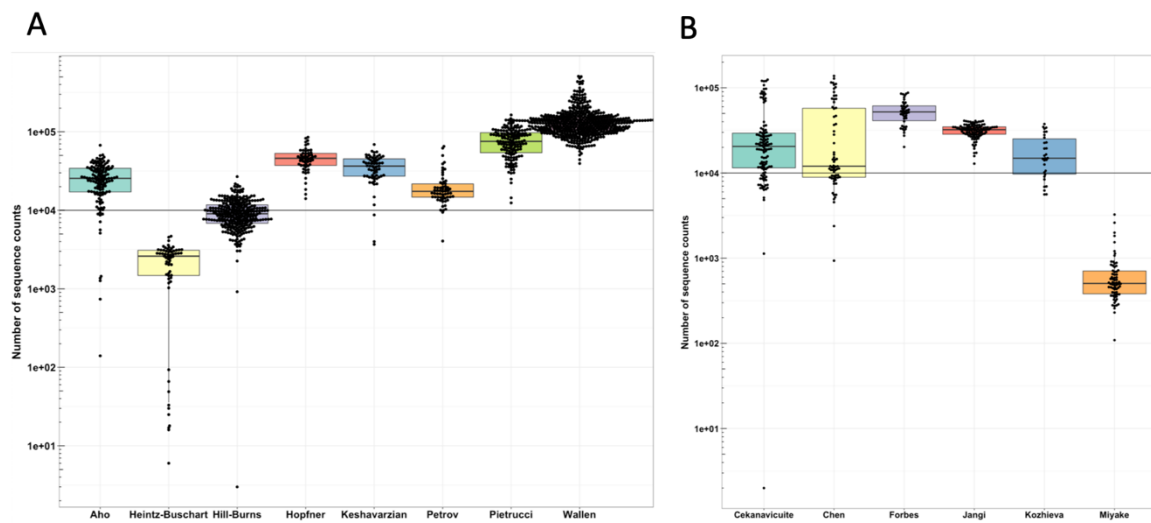

**Supplementary Figure 2: Meta-analysis of richness, evenness and Shannon index for PD studies after adjusting for Age and Sex.**

Richness, evenness and Shannon index meta-analyses for Parkinson’s Disease studies. A) Forest plot for the richness. B) Forest plot for the evenness. C) Forest plot for the Shannon index.

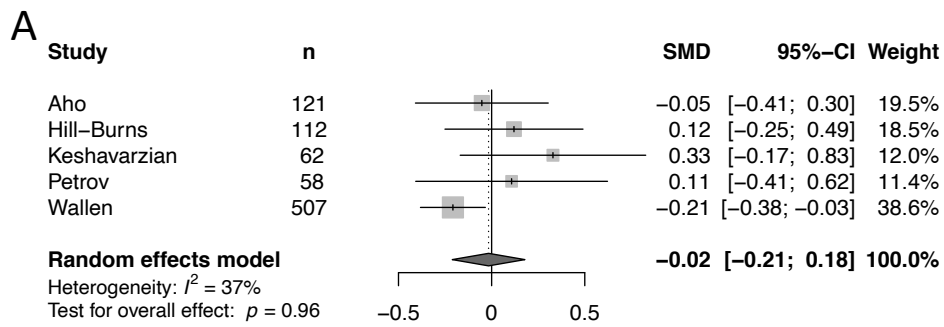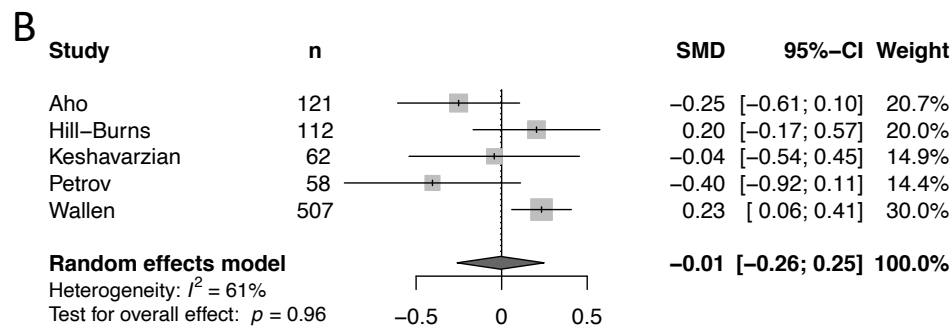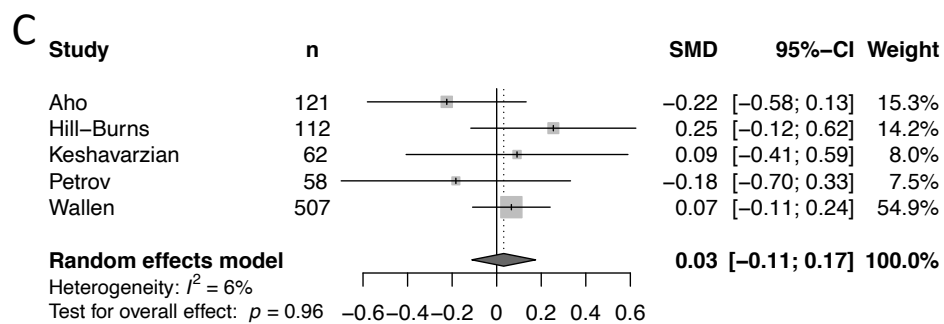

**Supplementary Table 1: original studies from Query#1 (Parkinson's Disease) matching our selection criteria**

|                                                  | 16S data               | PD vs HC info | Clinical/metadata | Country | N (PD/HC) | Techno   | 16S region    | Included into the meta-analysis? |
|--------------------------------------------------|------------------------|---------------|-------------------|---------|-----------|----------|---------------|----------------------------------|
| <b>Keshavarzian <i>et al.</i></b> <sup>1</sup>   | SRR1734369             | Yes           | Yes               | USA     | 34/31     | Illumina | V4            | Yes                              |
| <b>Hill-Burns <i>et al.</i></b> <sup>2</sup>     | ERP016332              | Yes           | Yes               | USA     | 197/130   | Illumina | V4            | Yes                              |
| <b>Petrov <i>et al.</i></b> <sup>3</sup>         | Provided by Dr. Petrov | Yes           | Yes               | Russian | 89/66     | Illumina | V3-V4         | Yes                              |
| <b>Hopfner <i>et al.</i></b> <sup>4</sup>        | PRJEB14928             | Yes           | No                | Germany | 29/29     | Illumina | V1-V2         | Yes                              |
| <b>Li W <i>et al.</i></b> <sup>5</sup>           | No                     | No            | No                | China   | 24/14     | Illumina | V3-V4 + V4-V5 | No                               |
| <b>Heintz-Buscart <i>et al.</i></b> <sup>6</sup> | PRJNA381395            | Yes           | No                | Germany | 26/38     | Illumina | V4            | No*                              |
| <b>Qian <i>et al.</i></b> <sup>7</sup>           | PRJNA391524            | No            | No                | China   | 45/45     | Illumina | V3-V4         | No                               |
| <b>Lin A <i>et al.</i></b> <sup>8</sup>          | No                     | No            | No                | China   | 75/45     | Illumina | V4            | No                               |
| <b>Barichella <i>et al.</i></b> <sup>9</sup>     | No                     | No            | No                | Italy   | 193/113   | Illumina | V3-V4         | No                               |
| <b>Pietrucci <i>et al.</i></b> <sup>10</sup>     | PRJNA510730            | Yes           | No                | Italy   | 80/82     | Illumina | V3-V4         | Yes                              |
| <b>Li F <i>et al.</i></b> <sup>11</sup>          | No                     | No            | No                | China   | 10/10     | Illumina | V3-V4         | No                               |
| <b>Aho <i>et al.</i></b> <sup>12</sup>           | PRJEB27564             | Yes           | Yes               | Finland | 64/64     | Illumina | V3-V4         | Yes                              |
| <b>Lin CH <i>et al.</i></b> <sup>13</sup>        | No                     | No            | No                | China   | 80/80     | Illumina | V3-V4         | No                               |
| <b>Li C <i>et al.</i></b> <sup>14</sup>          | No                     | No            | No                | China   | 51/48     | Illumina | V3-V4         | No                               |

|                                                  |                                                             |    |    |            |         |          |           |    |
|--------------------------------------------------|-------------------------------------------------------------|----|----|------------|---------|----------|-----------|----|
| <b>Vidal-Martinez <i>et al.</i><sup>15</sup></b> | No access –<br>Not approved<br>by IRB                       | No | No | USA        | 10/10   | Illumina | V3-<br>V4 | No |
| <b>Hegelmaier <i>et al.</i><sup>16</sup></b>     | No                                                          | No | No | German     | 54/32   | Illumina | V1-<br>V3 | No |
| <b>Ren <i>et al.</i><sup>17</sup></b>            | PRJNA561023                                                 | No | No | China      | 27/13   | Illumina | V4-<br>V5 | No |
| <b>Baldini <i>et al.</i><sup>18</sup></b>        | No                                                          | No | No | Lux/German | 147/162 | Illumina | V3-<br>V4 | No |
| <b>Wallen <i>et al.</i><sup>19</sup></b>         | PRJNA601994<br>(but still not<br>available by<br>June 2020) | No | No | USA        | 323/184 | Illumina | V4        | No |

(\*) sequencing files were processed but the sequencing depth was too low for an accurate quantification of alpha-diversity measures.

**Supplementary Table 2: original studies for Query#2 (Multiple Sclerosis Disease)  
matching our selection criteria**

|                                                     | 16S data                                             | MS vs<br>HC info | Clinical/metadata | Country | N<br>(MS/HC) | Techno   | 16S<br>region | Included<br>into the<br>meta-<br>analysis? |
|-----------------------------------------------------|------------------------------------------------------|------------------|-------------------|---------|--------------|----------|---------------|--------------------------------------------|
| <b>Miyake <i>et al.</i><sup>20</sup></b>            | For DDBJ<br>accession<br>numbers, see<br>publication | Yes              | No                | Japan   | 20/58        | Illumina | V1-<br>V2     | No*                                        |
| <b>Chen <i>et al.</i><sup>21</sup></b>              | Ask AC/MF                                            | Yes              | No                | USA     | 31/36        | Illumina | V3-<br>V5     | Yes                                        |
| <b>Jangi <i>et al.</i><sup>22</sup></b>             | PRJNA321051                                          | Yes              | No                | Canada  | 60/43        | Illumina | V4            | Yes                                        |
| <b>Cekanaviciute<br/><i>et al.</i><sup>23</sup></b> | Ask AC/MF                                            | Yes              | No                | USA     | 70/70        | Illumina | V4            | Yes                                        |
| <b>Forbes <i>et al.</i><sup>24</sup></b>            | PRJNA450340                                          | Yes              | No                | Canada  | 19/23        | Illumina | V4            | Yes                                        |
| <b>Kozhieva <i>et al.</i><sup>25</sup></b>          | PRJNA565173                                          | Yes              | No                | Russian | 15/15        | Illumina | V3-<br>V4     | Yes                                        |
| <b>Reynders <i>et al.</i><sup>26</sup></b>          | No                                                   | No               | No                | Belgian | 98/120       | Illumina | V4            | No                                         |

(\*) sequencing files were processed but the sequencing depth was too low for an accurate quantification of alpha-diversity measures.

**Supplementary Table 3: original studies for Query#3 (Alzheimer’s Disease) matching our selection criteria**

|                             | 16S data      | AD vs HC info | Clinical/metadata | Country | N (AD/HC) | Techno   | 16S region | Included into the meta-analysis? |
|-----------------------------|---------------|---------------|-------------------|---------|-----------|----------|------------|----------------------------------|
| Vogt et al. <sup>27</sup>   | Under request | Yes           | Under request     | USA     | 25/25     | Illumina | V4         | No                               |
| Zhuang et al. <sup>28</sup> | No            | No            | No                | China   | 43/43     | Illumina | V3-V4      | No                               |

## References

1. Keshavarzian A, Green SJ, Engen PA, et al. Colonic bacterial composition in Parkinson’s disease. *Mov Disord.* 2015;30(10):1351–1360. doi:10.1002/mds.26307
2. Hill-Burns EM, Debelius JW, Morton JT, et al. Parkinson’s disease and Parkinson’s disease medications have distinct signatures of the gut microbiome. *Mov Disord.* 2017;32(5):739–749. doi:10.1002/mds.26942
3. Petrov VA, Saltykova I V., Zhukova IA, et al. Analysis of gut microbiota in patients with parkinson’s disease. *Bull Exp Biol Med.* 2017;162(6):734–737. doi:10.1007/s10517-017-3700-7
4. Hopfner F, Künstner A, Müller SH, et al. Gut microbiota in Parkinson disease in a northern German cohort. *Brain Res.* 2017;1667:41–45. doi:10.1016/j.brainres.2017.04.019
5. Li W, Wu X, Hu X, et al. Structural changes of gut microbiota in Parkinson’s disease and its correlation with clinical features. *Sci China Life Sci.* 2017;60(11):1223–1233. doi:10.1007/s11427-016-9001-4
6. Heintz-Buschart A, Pandey U, Wicke T, et al. The nasal and gut microbiome in Parkinson’s disease and idiopathic rapid eye movement sleep behavior disorder. *Mov Disord.* 2018;33(1):88–98. doi:10.1002/mds.27105
7. Qian Y, Yang X, Xu S, et al. Alteration of the fecal microbiota in Chinese patients with Parkinson’s disease. *Brain Behav Immun.* 2018;70:194–202. doi:10.1016/j.bbi.2018.02.016
8. Lin A, Zheng W, He Y, et al. Gut microbiota in patients with Parkinson’s disease in southern China. *Park Relat Disord.* 2018;53(April):82–88.

- doi:10.1016/j.parkreldis.2018.05.007
9. Barichella M, Severgnini M, Cilia R, u. a. Unraveling gut microbiota in Parkinson's disease and atypical parkinsonism. *Mov Disord.* 2019;34(3):396–405.  
doi:10.1002/mds.27581
  10. Pietrucci D, Cerroni R, Unida V, u. a. Dysbiosis of gut microbiota in a selected population of Parkinson's patients. *Park Relat Disord.* 2019;65(June):124–130.  
doi:10.1016/j.parkreldis.2019.06.003
  11. Li F, Wang P, Chen Z, Sui X, Xie X, Zhang J. Alteration of the fecal microbiota in North-Eastern Han Chinese population with sporadic Parkinson's disease. *Neurosci Lett.* 2019;707:134297. doi:10.1016/j.neulet.2019.134297
  12. Aho VTE, Pereira PAB, Voutilainen S, u. a. Gut microbiota in Parkinson's disease: Temporal stability and relations to disease progression. *EBioMedicine.* 2019;44:691–707. doi:10.1016/j.ebiom.2019.05.064
  13. Lin CH, Chen CC, Chiang HL, u. a. Altered gut microbiota and inflammatory cytokine responses in patients with Parkinson's disease. *J Neuroinflammation.* 2019;16(1):1–9.  
doi:10.1186/s12974-019-1528-y
  14. Li C, Cui L, Yang Y, u. a. Gut microbiota differs between parkinson's disease patients and healthy controls in northeast China. *Front Mol Neurosci.* 2019;12(July):1–13.  
doi:10.3389/fnmol.2019.00171
  15. Vidal-Martinez G, Chin B, Camarillo C, u. a. A Pilot Microbiota Study in Parkinson's Disease Patients versus Control Subjects, and Effects of FTY720 and FTY720-Mitoxo Therapies in Parkinsonian and Multiple System Atrophy Mouse Models. *J Parkinsons Dis.* 2020;10(1):185–192. doi:10.3233/JPD-191693
  16. Hegelmaier T, Lebbing M, Duscha A, u. a. Interventional Influence of the Intestinal Microbiome Through Dietary Intervention and Bowel Cleansing Might Improve Motor Symptoms in Parkinson's Disease. *Cells.* 2020;9(2):376. doi:10.3390/cells9020376
  17. Ren T, Gao Y, Qiu Y, u. a. Gut Microbiota Altered in Mild Cognitive Impairment Compared With Normal Cognition in Sporadic Parkinson's Disease. *Front Neurol.* 2020;11(February):1–8. doi:10.3389/fneur.2020.00137
  18. Baldini F, Hertel J, Sandt E, u. a. Parkinson's disease-associated alterations of the gut microbiome can invoke disease-relevant metabolic changes. *bioRxiv.* Published online 2019:1–36.
  19. Wallen ZD, Appah M, Dean MN, u. a. Characterizing dysbiosis of gut microbiome in PD: evidence for overabundance of opportunistic pathogens. *npj Park Dis.*

- 2020;6(1):1–12. doi:10.1038/s41531-020-0112-6
20. Miyake S, Kim S, Suda W, et al. Dysbiosis in the gut microbiota of patients with multiple sclerosis, with a striking depletion of species belonging to clostridia XIVa and IV clusters. *PLoS One*. 2015;10(9):1–16. doi:10.1371/journal.pone.0137429
  21. Chen J, Chia N, Kalari KR, et al. Multiple sclerosis patients have a distinct gut microbiota compared to healthy controls. *Sci Rep*. 2016;6:1–10. doi:10.1038/srep28484
  22. Jangi S, Gandhi R, Cox LM, et al. Alterations of the human gut microbiome in multiple sclerosis. *Nat Commun*. 2016;7(May). doi:10.1038/ncomms12015
  23. Cekanaviciute E, Yoo BB, Runia TF, et al. Erratum: Gut bacteria from multiple sclerosis patients modulate human T cells and exacerbate symptoms in mouse models (Proc Natl Acad Sci USA (2017) 114 (10713–10718) DOI: 10.1073/pnas.1711235114). *Proc Natl Acad Sci U S A*. 2017;114(42):E8943. doi:10.1073/pnas.1716911114
  24. Forbes JD, Chen CY, Knox NC, et al. A comparative study of the gut microbiota in immune-mediated inflammatory diseases - Does a common dysbiosis exist? *Microbiome*. 2018;6(1):1–15. doi:10.1186/s40168-018-0603-4
  25. Kozhieva M, Naumova N, Alikina T, Boyko A, Vlassov V, Kabilov MR. Primary progressive multiple sclerosis in a Russian cohort: Relationship with gut bacterial diversity. *BMC Microbiol*. 2019;19(1):1–9. doi:10.1186/s12866-019-1685-2
  26. Reynders T, Devolder L, Valles-Colomer M, et al. Gut microbiome variation is associated to Multiple Sclerosis phenotypic subtypes. *Ann Clin Transl Neurol*. Published online 2020:406–419. doi:10.1002/acn3.51004
  27. Vogt NM, Kerby RL, Dill-McFarland KA, et al. Gut microbiome alterations in Alzheimer’s disease. *Sci Rep*. 2017;7(1):1–11. doi:10.1038/s41598-017-13601-y
  28. Zhuang ZQ, Shen LL, Li WW, et al. Gut Microbiota is Altered in Patients with Alzheimer’s Disease. *J Alzheimer’s Dis*. 2018;63(4):1337–1346. doi:10.3233/JAD-180176
